# Supplementary material for: LCMR1 Promotes Large-Cell Lung Cancer Proliferation and Metastasis by Downregulating HLA-Encoding Genes
Source: MDPI journal article supplement (doi:10.3390/cancers15225445), 2023-11-16
Supplement: s1 [file s1]

**Table S1.** Primers for quantitative RT-PCR.

| Gene            | Forward primer           | Reverse primer           |
|-----------------|--------------------------|--------------------------|
| <i>LCMR1</i>    | TGGTTCCCATGATAACAGCAGCCT | CGGCTCTGTTTGTGCTTGTGCTTA |
| <i>β-actin</i>  | CATGTACGTTGCTATCCAGGC    | CTCCTTAATGTCACGCACGAT    |
| <i>HLA-A</i>    | AAAAGGAGGGAGTTACACTCAGG  | GCTGTGAGGGACACATCAGAG    |
| <i>HLA-B</i>    | CAGTTCGTGAGGTTGACAG      | CAGCCGTACATGCTCTGGA      |
| <i>HLA-C</i>    | CCATGAGGTATTTGTGGACCG    | TCTCGGACTCTCGTCGTCG      |
| <i>HLA-DMB</i>  | ACCTGTCTGTTGGATGATGCT    | CGCAAGGGGCCATCTTATTCT    |
| <i>HLA-DOB</i>  | ATCTGACCCGACTGGATTCCT    | GCACCTTTTCTGTCCCGTTG     |
| <i>HLA-DPA1</i> | ATGCGCCCTGAAGACAGAATG    | ACACATGGTCCGCCTTGATG     |
| <i>HLA-DQA1</i> | TCGCTCTGACCACCGTGAT      | AGGGACCGTAAACTGGTACAA    |
| <i>HLA-DQA2</i> | TGCCTCCTATGGTGTGAACTT    | AGACAGTCTCTTTTCGTCTCCAG  |
| <i>HLA-DQB1</i> | ACCTTCGGGTAGCAACTGTC     | AAATCCTCGGGAGAGTCTCTG    |
| <i>HLA-DRB5</i> | CGGGGTTGGTGAGAGCTTC      | AACCACCTGACTTCAATGCTG    |
| <i>HLA-F</i>    | TGGCCCTGACCGATACTTG      | GCAGGAATTGCGTGTGCTC      |
