# Supplementary figures and images for: LCMR1 Promotes Large-Cell Lung Cancer Proliferation and Metastasis by Downregulating HLA-Encoding Genes
Source: MDPI journal article supplement (doi:10.3390/cancers15225445), 2023-11-16

File S1

uncropped blots for Figure 1C

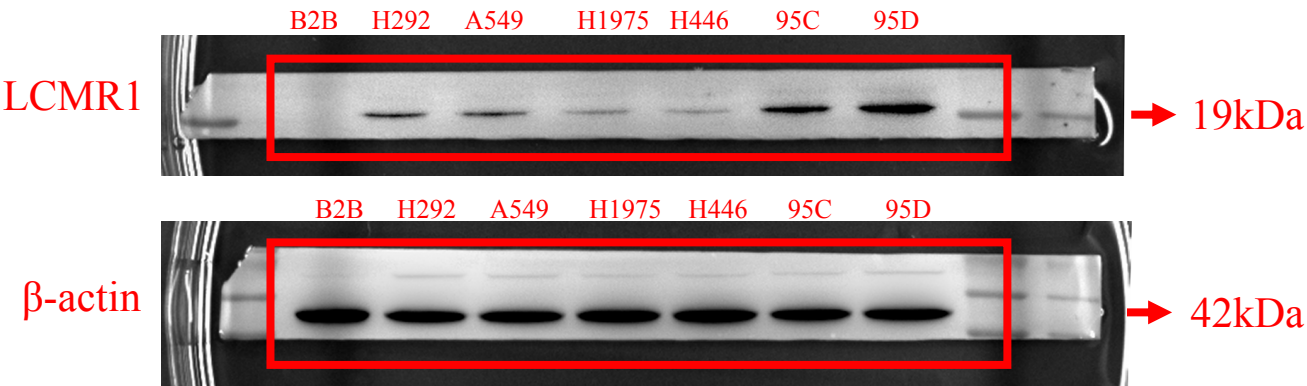

uncropped blots for Figure 1F

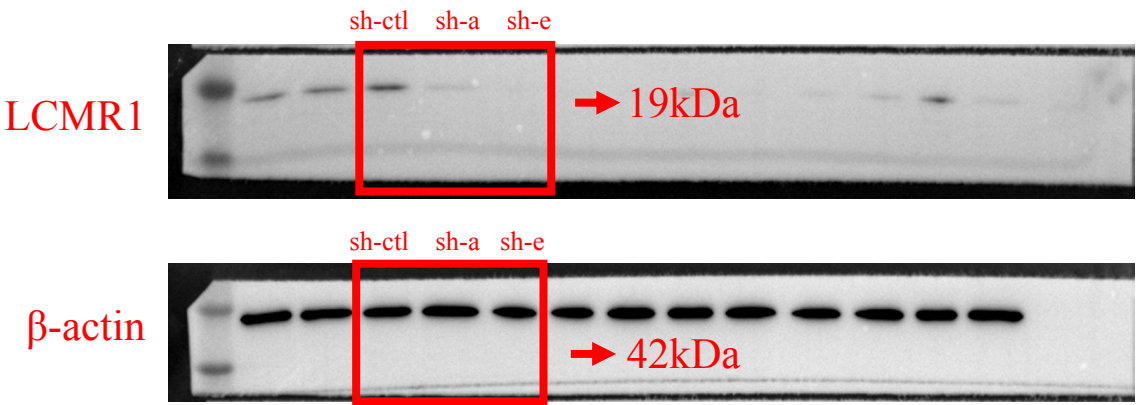

uncropped blots for Figure 3E

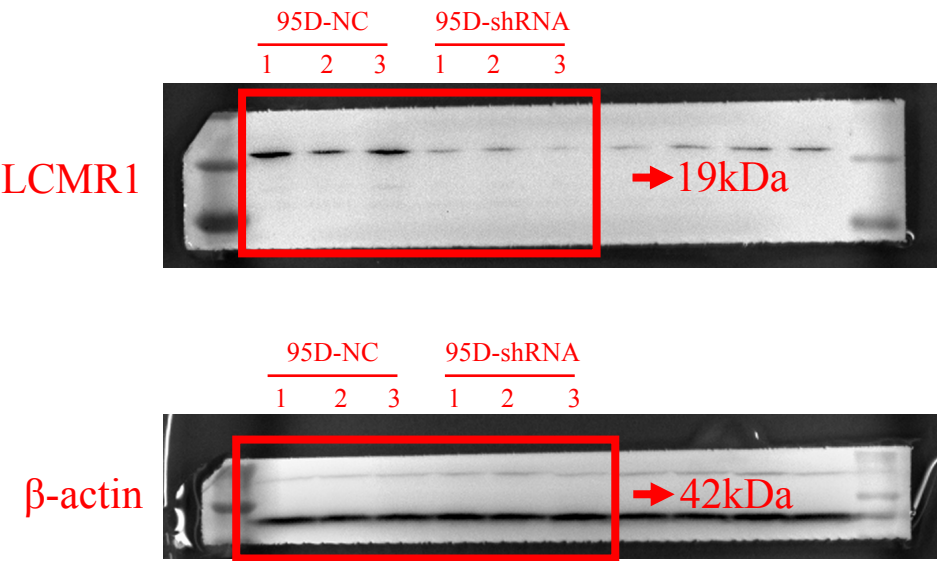

Supplement: s1 [file s1]
